# Supplementary material for: Sulfonate-Based Triazine Multiple-Electron Anolyte for Aqueous Organic Flow Batteries
Source: PubMed Central journal article supplement (PMC10401562; doi:10.1021/acsami.3c05850), 2023-07-25
Supplement: am3c05850_si_001.pdf [file am3c05850_si_001.pdf]

## Sulfonate-based triazine multiple-electron anolyte for Aqueous Organic Flow Batteries.

Juan Asenjo-Pascual,<sup>a,b,\*</sup> Cedrik Wiberg,<sup>c</sup> Mahsa Shahsavan,<sup>c</sup> Ivan Salmeron-Sanchez,<sup>a</sup>  
Juan Ramon Aviles Moreno,<sup>a</sup> P. Mauleón,<sup>b</sup> and P. Ocón,<sup>a</sup> and Pekka Peljo.<sup>c,\*</sup>

<sup>a</sup> Department of Applied Physical Chemistry, Universidad Autónoma de Madrid, c/Fco. Tomás y Valiente 7, Cantoblanco, 28049 Madrid, Spain. <sup>b</sup> Department of Organic Chemistry, Universidad Autónoma de Madrid.

<sup>c</sup> Research Group of Battery Materials and Technologies, Department of Mechanical and Materials Engineering, Faculty of Technology, University of Turku, 20014 Turku, Finland.

Corresponding author: [juan.asenjo@uam.es](mailto:juan.asenjo@uam.es) and [pekka.peljo@utu.fi](mailto:pekka.peljo@utu.fi)

### Table of contents:

1. Synthesis and characterization
2. Electrochemical characterisation
3. Solubility. UV-Vis
4. DFT Calculation
5. Cell-tests
  - i) Cell stuck
  - ii) CV + 1H NMR after stuck
  - iii) solubility with different KCl concentrations
  - iv) PEIS 0 and 50 % SOC
  - v) Load-Curve
  - vi) Third electron
  - vii) CV after cycling
6. Comparison with other organic electrolytes

## 1. Synthesis and characterization

### Synthesis of 2,4,6-tris-(4-pyridyl)-1,3,5-triazine TPT[1]

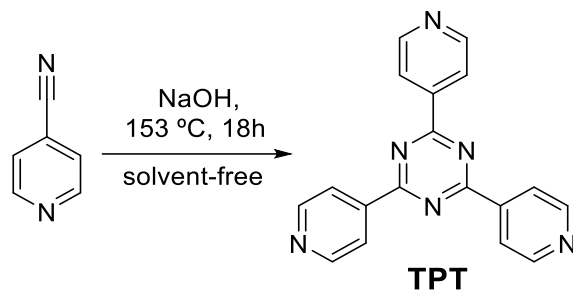

Scheme 1: Synthetic route towards TPT.

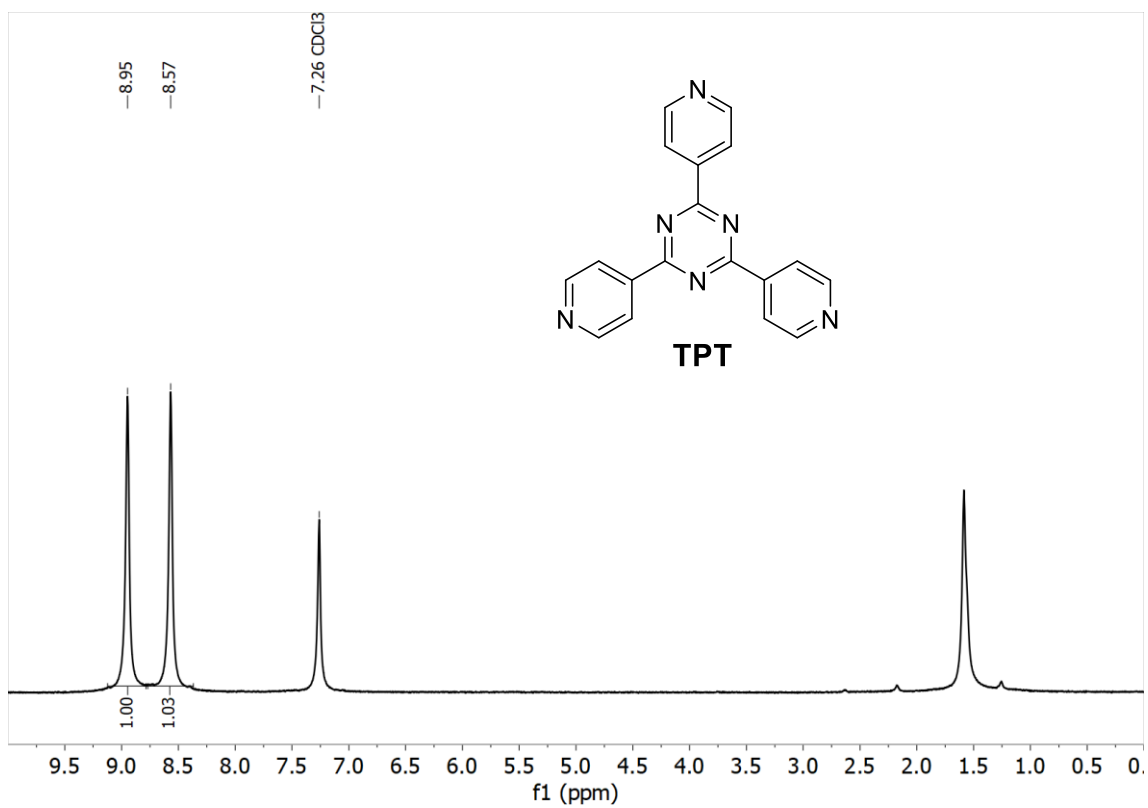

Figure S1: <sup>1</sup>H NMR in CDCl<sub>3</sub> of compound TPT.

Synthesis of 3,3',3''-((1,3,5-triazine-2,4,6-triyl)tris(pyridine-1-ium-4,1-diyl))tris(propane-1-sulfonate) ( $(\text{SPr})_3\text{4TpyTz}$ )

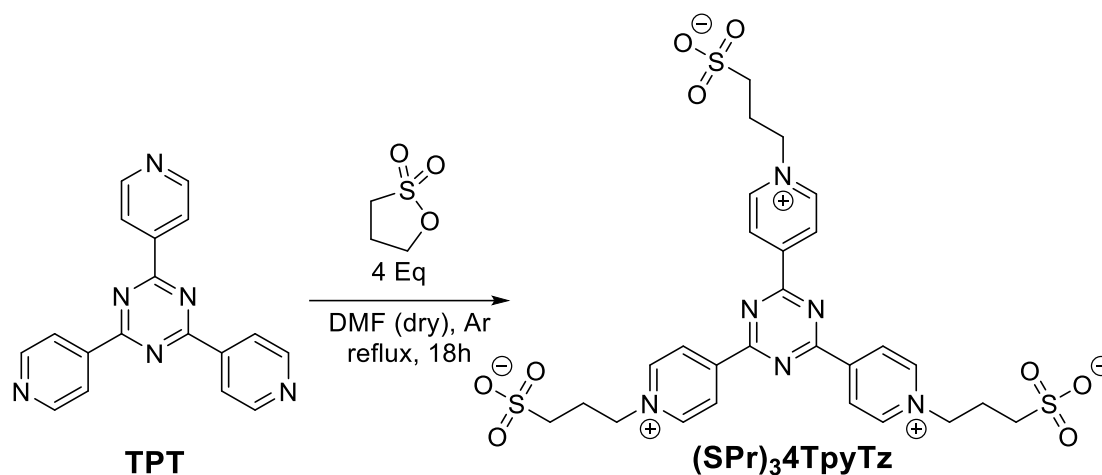

Scheme 2: Synthetic route towards  $(\text{SPr})_3\text{4TpyTz}$ .

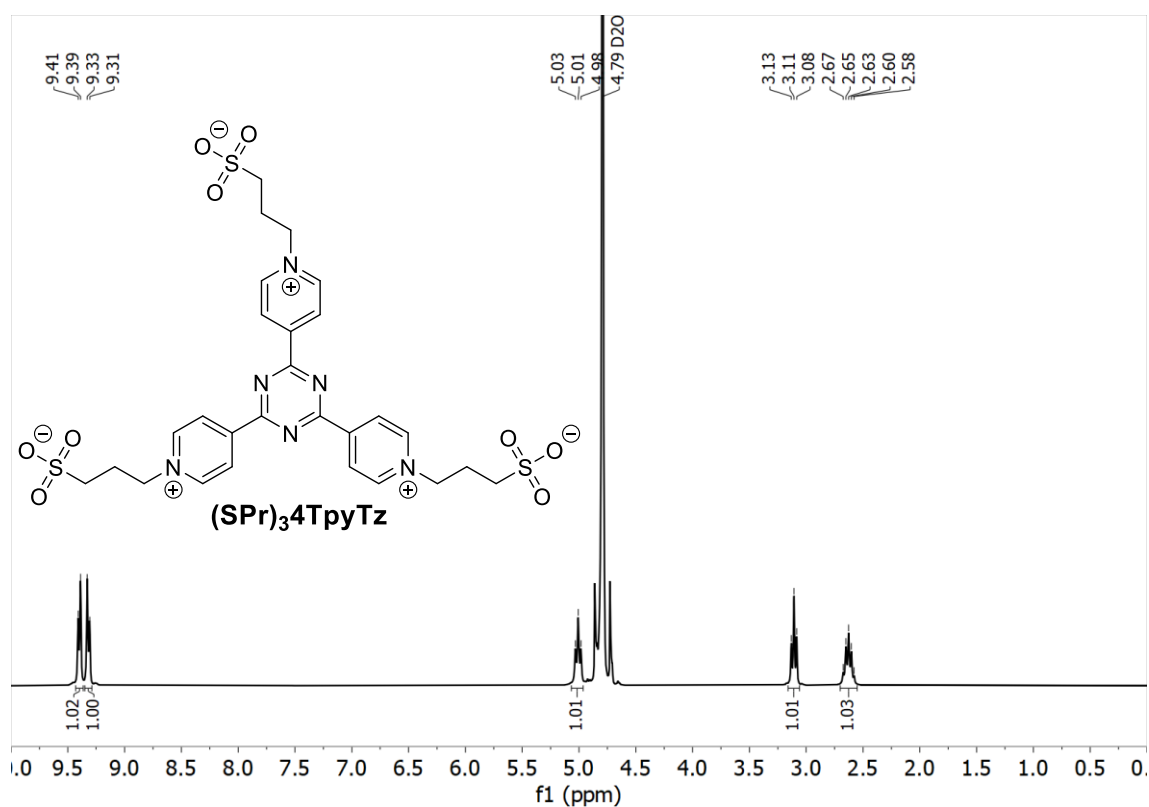

Figure S2:  $^1\text{H}$  NMR in  $\text{D}_2\text{O}$  of compound  $(\text{SPr})_3\text{4TpyTz}$ .

## 2. Electrochemical characterization of (SPr)<sub>3</sub>4TpyTz

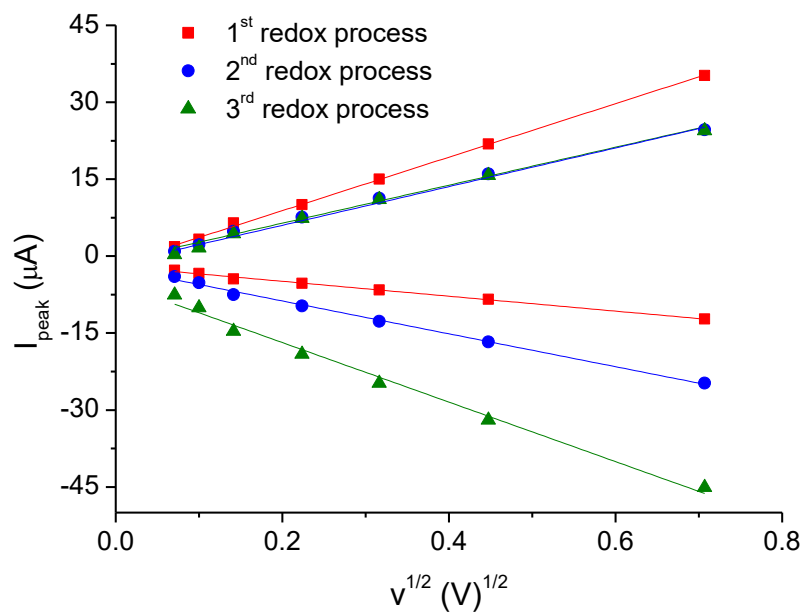

**Figure S5:** Peak current (anodic and cathodic) vs square root of the scan rate for the first (red) second (blue) and third (green) redox processes of 1mM (SPr)<sub>3</sub>4TpyTz in 1 M KCl.

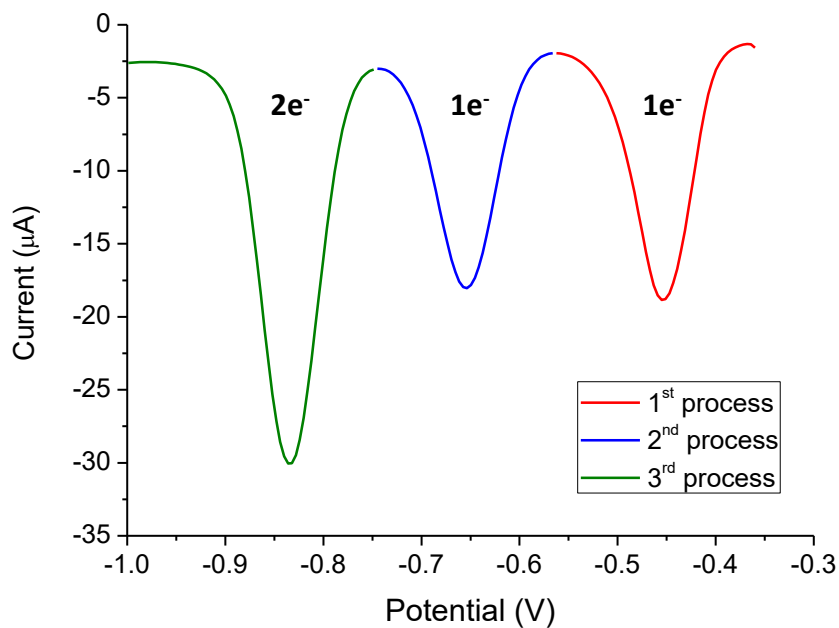

**Figure S6:** Differential Pulse Voltammetry of 1mM (SPr)<sub>3</sub>4TpyTz in 1 M KCl.

## Rotating Disk Electrode (RDE) measurements and Kinetic analysis

The diffusion coefficient was calculated using the Levich approximation as given in Eq. S1. Koutecký-Levich analysis (see Eq. S2) at low overpotentials can be extrapolated to infinite rotation rate and fitted to the Butler-Volmer equation (see Eq. S3) to get the standard rate constant of the reduction process.

$$I_L = 0.620nFAC_oD^{2/3}\nu^{-1/6}\omega^{1/2} \quad (\text{S1})$$

Where  $I_L$  is the limiting current (A),  $n$  is the number of electrons involved in the redox reaction and in all the cases  $n = 1$  (the difference between the reduction and oxidation peaks studied correspond to values of 59 mV or even higher),  $F$  is the Faraday constant (C/mol),  $A$  is the electrode area (cm<sup>2</sup>),  $C_o$  is the molar concentration of the redox active material (mol/cm<sup>3</sup>),  $D$  is the diffusion coefficient (cm<sup>2</sup>/s),  $\nu$  is the kinematic viscosity (cm<sup>2</sup>/s) and  $\omega$  the angular rotation rate of the electrode (rad/s).

$$\frac{1}{i} = \frac{1}{i_k} + \frac{1}{0.620nFAD^{2/3}\nu^{-1/6}\omega^{1/2}C_o} \quad (\text{S2})$$

$$\log i_K = \log nFC_oAk_o + \frac{\alpha nF\eta}{2.303RT} \quad (\text{S3})$$

Where  $I_K$  is the kinetic current (A),  $C_o$  is the molar concentration of the redox active material (mol/cm<sup>3</sup>),  $\alpha$  is the transfer coefficient,  $k_o$  is the kinetic constant (cm/s),  $\eta$  is the overpotential  $|E-E_{1/2}|$  (V),  $R$  is the gas constant (J/mol·K) and  $T$  the temperature (K).

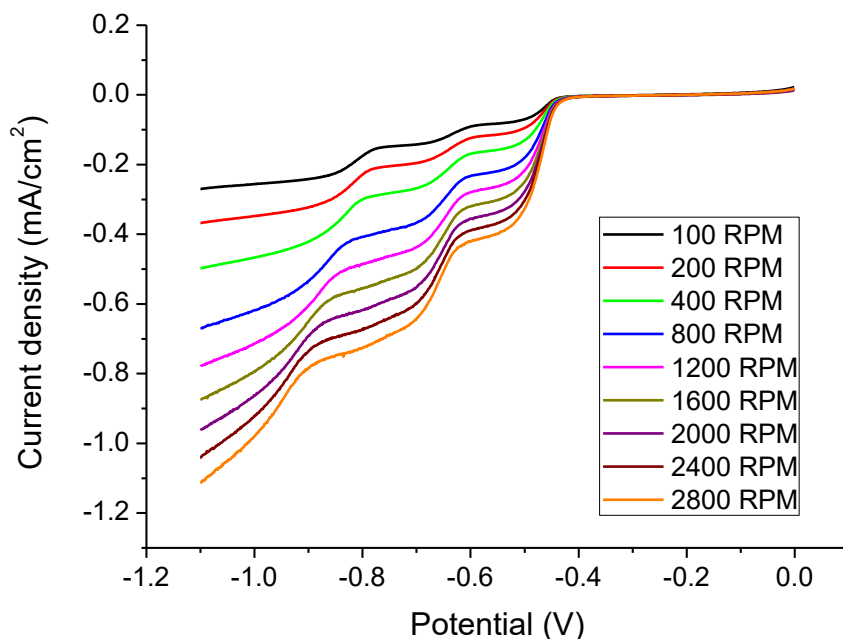

**Figure S7:** Rotating Disk Electrode study of the reduction of 1 mM of (SPr)<sub>3</sub>4TpyTz in 1 M KCl on a GC electrode at rotation rates from 100 to 2800 rpm.

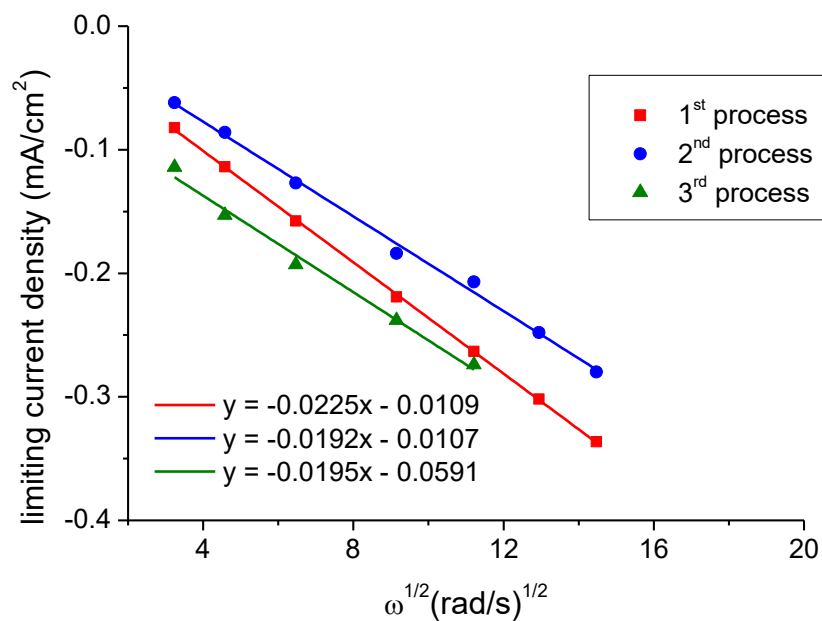

**Figure S8:** Levich plot for the first (red), second (blue), and third (green) redox processes (limiting current vs square root of rotation rate in rad/s) of 1 mM of (SPr)<sub>3</sub>4TpyTz in 1 M KCl. Note that all the slopes are almost equal but the fact that the third process involves 2 electrons make the diffusion coefficient lower.

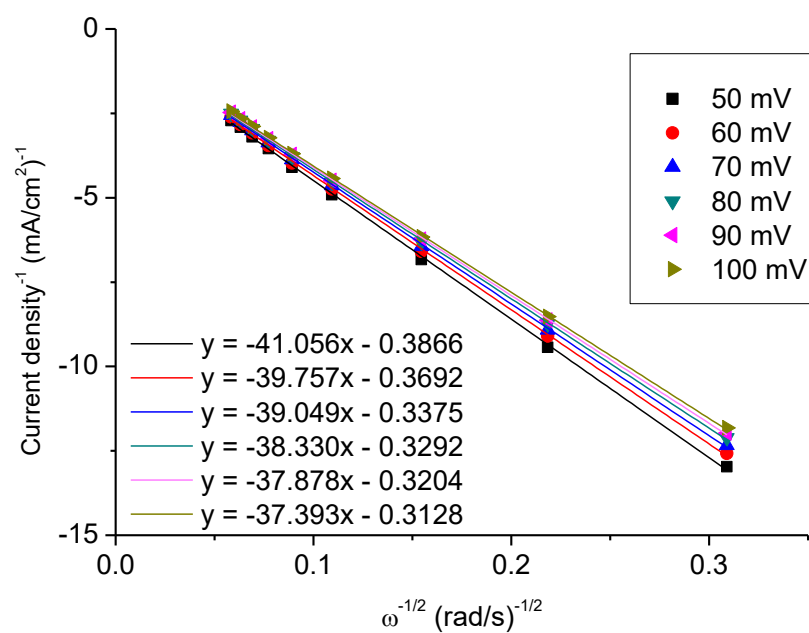

**Figure S9:** Koutecky-Levich plot at different overpotentials for the first reduction process of 1 mM of (SPr)<sub>3</sub>4TpyTz in 1 M KCl.

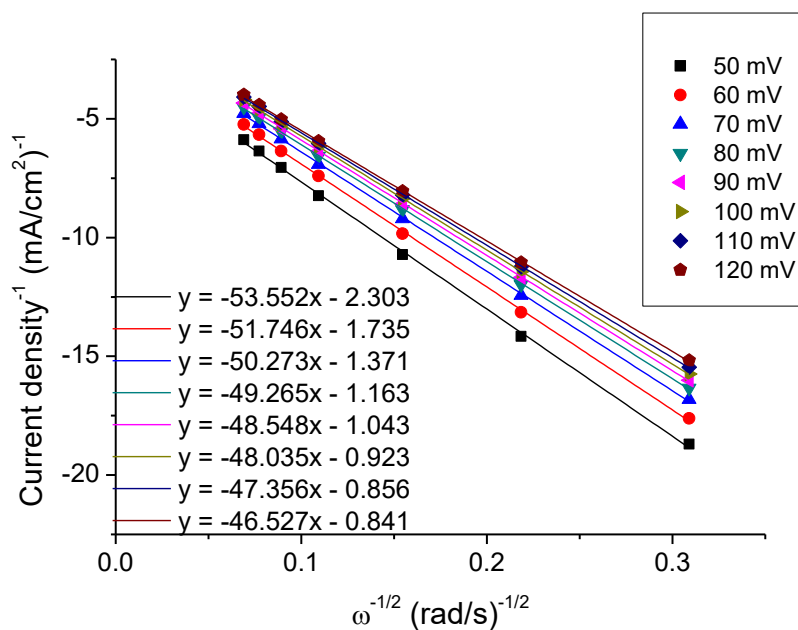

**Figure S10:** Koutecky-Levich plot at different overpotentials for the second reduction process of 1 mM of  $(\text{SPr})_3\text{4TpyTz}$  in 1 M KCl.

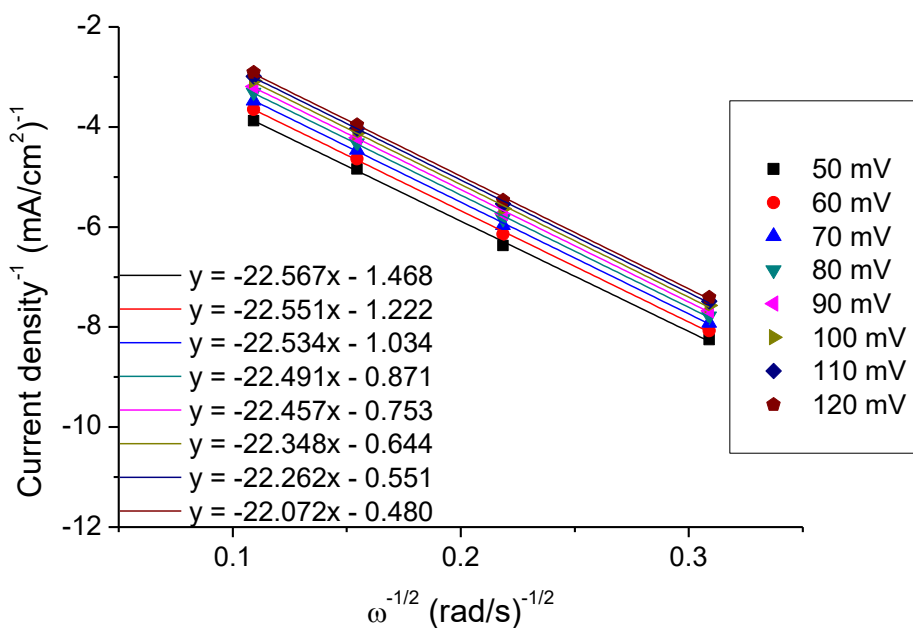

**Figure S11:** Koutecky-Levich plot at different overpotentials for the third reduction process of 1 mM of  $(\text{SPr})_3\text{4TpyTz}$  in 1 M KCl. The third process present contribution of the other two processes moving away from the Koutecky-Levich approach.

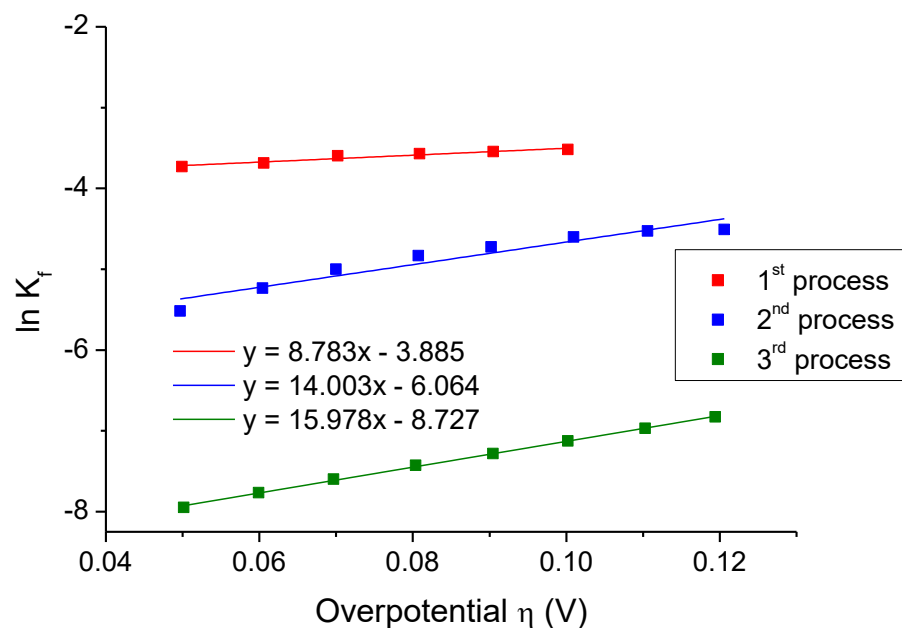

**Figure S12:** Tafel plot, the logarithm of kinetically limited current vs overpotential for the first (red) second (blue) and third (green) redox processes of 1mM of **(SPr)<sub>3</sub>4TpyTz** in 1 M KCl.

### 3. Solubility. UV-Vis

By multiplying the concentration achieved from the sample interpolation (red crosses correspond to diluted 120000 times in Figure S13) by the corresponding dilution factor, the maximum solubility of the compounds was calculated.

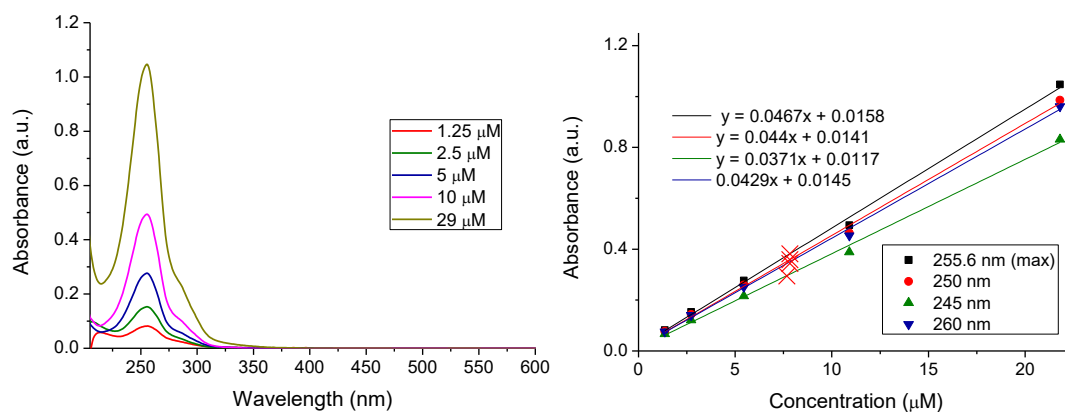

**Figure S13:** (a) UV-Vis spectra at different concentrations of compound **(SPr)<sub>3</sub>4TpyTz** in 1 M KCl (b) Calibration curves at different wavelengths and saturated solution (red crosses).



#### 4. DFT calculation, optimized geometries

| (SPr) <sub>3</sub> 4TpyTz |              |              |              |         |               |              |              |
|---------------------------|--------------|--------------|--------------|---------|---------------|--------------|--------------|
| Oxidized                  |              |              |              | Reduced |               |              |              |
| 6                         | 1.288148000  | -0.223624000 | -1.057641000 | 6       | 1.044190000   | 0.781271000  | -1.374753000 |
| 6                         | -0.450522000 | 1.205076000  | -1.061185000 | 6       | -1.192470000  | 0.530528000  | -1.367395000 |
| 6                         | -0.818679000 | -1.014898000 | -1.043739000 | 6       | 0.146036000   | -1.306974000 | -1.396272000 |
| 6                         | -0.972714000 | 2.594199000  | -1.055451000 | 6       | -2.554086000  | 1.126529000  | -1.360936000 |
| 6                         | -2.345765000 | 2.831935000  | -1.025335000 | 6       | -3.686749000  | 0.313667000  | -1.366220000 |
| 6                         | -0.100737000 | 3.676862000  | -1.073004000 | 6       | -2.726046000  | 2.509681000  | -1.353906000 |
| 6                         | -2.801624000 | 4.128099000  | -1.008932000 | 6       | -4.934365000  | 0.888582000  | -1.368319000 |
| 1                         | -3.056284000 | 2.017325000  | -1.013745000 | 1       | -3.595049000  | -0.763241000 | -1.371047000 |
| 6                         | -0.609525000 | 4.957791000  | -1.052034000 | 6       | -3.996947000  | 3.035316000  | -1.356120000 |
| 1                         | 0.970418000  | 3.533162000  | -1.096827000 | 1       | -1.873951000  | 3.174339000  | -1.348905000 |
| 1                         | -3.854474000 | 4.377500000  | -0.983811000 | 1       | -5.848267000  | 0.309476000  | -1.371964000 |
| 1                         | 0.012001000  | 5.844519000  | -1.038586000 | 1       | -4.192397000  | 4.099735000  | -1.350789000 |
| 6                         | 2.751456000  | -0.469265000 | -1.056264000 | 6       | 2.238119000   | 1.666554000  | -1.372027000 |
| 6                         | 3.648331000  | 0.597626000  | -1.059622000 | 6       | 2.093541000   | 3.051714000  | -1.320453000 |
| 6                         | 3.247292000  | -1.767909000 | -1.047185000 | 6       | 3.524808000   | 1.131571000  | -1.423999000 |
| 6                         | 4.997937000  | 0.337781000  | -1.054677000 | 6       | 3.212243000   | 3.851200000  | -1.323800000 |
| 1                         | 3.303235000  | 1.621915000  | -1.067942000 | 1       | 1.113640000   | 3.505343000  | -1.278972000 |
| 6                         | 4.609869000  | -1.973963000 | -1.039291000 | 6       | 4.609964000   | 1.974276000  | -1.426392000 |
| 1                         | 2.583403000  | -2.621062000 | -1.043938000 | 1       | 3.678879000   | 0.062569000  | -1.464648000 |
| 1                         | 5.744155000  | 1.121768000  | -1.059563000 | 1       | 3.162378000   | 4.931440000  | -1.283053000 |
| 1                         | 5.063324000  | -2.956972000 | -1.008804000 | 1       | 5.631214000   | 1.618623000  | -1.465590000 |
| 6                         | -1.759873000 | -2.161747000 | -1.025350000 | 6       | 0.301618000   | -2.716648000 | -1.411801000 |
| 6                         | -3.132586000 | -1.950965000 | -1.087775000 | 6       | -0.819229000  | -3.594864000 | -1.416962000 |
| 6                         | -1.279198000 | -3.466991000 | -0.937825000 | 6       | 1.585300000   | -3.332958000 | -1.421590000 |
| 6                         | -3.986863000 | -3.032279000 | -1.060188000 | 6       | -0.642239000  | -4.941772000 | -1.432900000 |
| 1                         | -3.544192000 | -0.953549000 | -1.153030000 | 1       | -1.824503000  | -3.197422000 | -1.408578000 |
| 6                         | -2.173130000 | -4.510219000 | -0.917185000 | 6       | 1.702359000   | -4.686814000 | -1.437360000 |
| 1                         | -0.219375000 | -3.673541000 | -0.887368000 | 1       | 2.481488000   | -2.728457000 | -1.416593000 |
| 1                         | -5.065638000 | -2.939458000 | -1.083009000 | 1       | -1.469731000  | -5.639811000 | -1.434303000 |
| 1                         | -1.863875000 | -5.544752000 | -0.850668000 | 1       | 2.660708000   | -5.190145000 | -1.441131000 |
| 7                         | -1.334829000 | 0.211279000  | -1.054377000 | 7       | -1.113285000  | -0.779162000 | -1.385581000 |
| 7                         | 0.483925000  | -1.283407000 | -1.043838000 | 7       | 1.257703000   | -0.513588000 | -1.393972000 |
| 7                         | 0.869731000  | 1.038952000  | -1.065706000 | 7       | -0.156254000  | 1.387603000  | -1.358381000 |
| 7                         | -3.499282000 | -4.282781000 | -0.983666000 | 7       | 0.604440000   | -5.498664000 | -1.458725000 |
| 7                         | 5.455983000  | -0.929453000 | -1.048754000 | 7       | 4.442645000   | 3.310263000  | -1.384621000 |
| 7                         | -1.937917000 | 5.161905000  | -1.026912000 | 7       | -5.073868000  | 2.228453000  | -1.371699000 |
| 6                         | -4.422148000 | -5.442636000 | -0.896403000 | 6       | 0.760005000   | -6.952557000 | -1.354419000 |
| 1                         | -5.351255000 | -5.145260000 | -1.377723000 | 1       | -0.077198000  | -7.414252000 | -1.880964000 |
| 1                         | -3.967062000 | -6.234633000 | -1.488346000 | 1       | 1.678572000   | -7.226696000 | -1.876021000 |
| 6                         | -4.636781000 | -5.895083000 | 0.557285000  | 6       | 0.803380000   | -7.403340000 | 0.098924000  |
| 1                         | -3.912839000 | -5.398505000 | 1.207354000  | 1       | -0.110846000  | -7.082147000 | 0.606002000  |
| 1                         | -4.424229000 | -6.964180000 | 0.617824000  | 1       | 1.648627000   | -6.925224000 | 0.602210000  |
| 6                         | -6.038945000 | -5.688139000 | 1.115742000  | 6       | 0.936297000   | -8.913627000 | 0.190558000  |
| 1                         | -6.792407000 | -6.216280000 | 0.526642000  | 1       | 0.084472000   | -9.416823000 | -0.273851000 |
| 1                         | -6.078937000 | -6.070863000 | 2.137410000  | 1       | 1.847931000   | -9.265013000 | -0.299324000 |
| 6                         | -2.478962000 | 6.541035000  | -0.939713000 | 6       | -6.428897000  | 2.818024000  | -1.306510000 |
| 1                         | -3.367560000 | 6.557124000  | -1.567975000 | 1       | -7.099402000  | 2.141938000  | -1.836751000 |
| 1                         | -1.734868000 | 7.201623000  | -1.379263000 | 1       | -6.395850000  | 3.765881000  | -1.843445000 |
| 6                         | -2.816349000 | 6.926365000  | 0.510099000  | 6       | -6.861525000  | 3.010865000  | 0.138241000  |
| 1                         | -3.852113000 | 7.269824000  | 0.542160000  | 1       | -6.840922000  | 2.048881000  | 0.657593000  |
| 1                         | -2.764718000 | 6.040787000  | 1.147597000  | 1       | -6.160723000  | 3.681433000  | 0.643166000  |
| 6                         | -1.962778000 | 8.033779000  | 1.114367000  | 6       | -8.263206000  | 3.594035000  | 0.189242000  |
| 1                         | -2.307992000 | 8.243299000  | 2.128732000  | 1       | -8.988751000  | 2.925703000  | -0.280826000 |
| 1                         | -2.031778000 | 8.957928000  | 0.535833000  | 1       | -8.311557000  | 4.561151000  | -0.317186000 |
| 6                         | 6.922586000  | -1.154170000 | -0.988915000 | 6       | 5.629806000   | 4.189287000  | -1.315124000 |
| 1                         | 7.111844000  | -2.135426000 | -1.419066000 | 1       | 6.417487000   | 3.714629000  | -1.900225000 |
| 1                         | 7.368896000  | -0.403892000 | -1.638901000 | 1       | 5.362431000   | 5.131727000  | -1.792839000 |
| 6                         | 7.464181000  | -1.033409000 | 0.445188000  | 6       | 6.056579000   | 4.396537000  | 0.129386000  |
| 1                         | 8.296955000  | -0.327455000 | 0.436522000  | 1       | 5.234786000   | 4.847568000  | 0.692208000  |
| 1                         | 6.698409000  | -0.600204000 | 1.092743000  | 1       | 6.284792000   | 3.428714000  | 0.584253000  |
| 6                         | 7.983576000  | -2.322087000 | 1.070574000  | 6       | 7.279615000   | 5.295352000  | 0.190910000  |
| 1                         | 8.363135000  | -2.107653000 | 2.071450000  | 1       | 7.070089000   | 6.283375000  | -0.226249000 |
| 1                         | 8.798508000  | -2.755289000 | 0.485843000  | 1       | 8.119134000   | 4.863029000  | -0.359045000 |
| 16                        | 6.764464000  | -3.622564000 | 1.276477000  | 16      | 7.849238000   | 5.555927000  | 1.869002000  |
| 16                        | -0.213432000 | 7.659521000  | 1.256602000  | 16      | -8.829048000  | 3.866009000  | 1.866729000  |
| 16                        | -6.578367000 | -3.979347000 | 1.212245000  | 16      | 1.010980000   | -9.492542000 | 1.883462000  |
| 8                         | 0.333671000  | 8.681601000  | 2.182069000  | 8       | -10.203438000 | 4.412858000  | 1.728131000  |

|   |              |              |              |   |              |               |             |
|---|--------------|--------------|--------------|---|--------------|---------------|-------------|
| 8 | 0.352383000  | 7.777027000  | -0.119649000 | 8 | -7.876374000 | 4.835681000   | 2.469695000 |
| 8 | 5.546443000  | -2.967300000 | 1.823236000  | 8 | 6.717348000  | 6.191924000   | 2.593874000 |
| 8 | 7.379935000  | -4.596952000 | 2.210367000  | 8 | 9.032093000  | 6.446649000   | 1.743907000 |
| 8 | -6.917658000 | -3.563968000 | -0.180828000 | 8 | -0.250070000 | -9.040087000  | 2.529175000 |
| 8 | -5.429885000 | -3.213020000 | 1.765101000  | 8 | 2.220537000  | -8.864760000  | 2.479609000 |
| 8 | -7.765482000 | -3.989549000 | 2.102339000  | 8 | 1.113607000  | -10.972489000 | 1.789057000 |
| 8 | -0.123473000 | 6.272675000  | 1.786345000  | 8 | -8.796370000 | 2.537048000   | 2.532083000 |
| 8 | 6.535595000  | -4.202266000 | -0.079880000 | 8 | 8.189605000  | 4.208978000   | 2.399546000 |

## 5. Cell testing

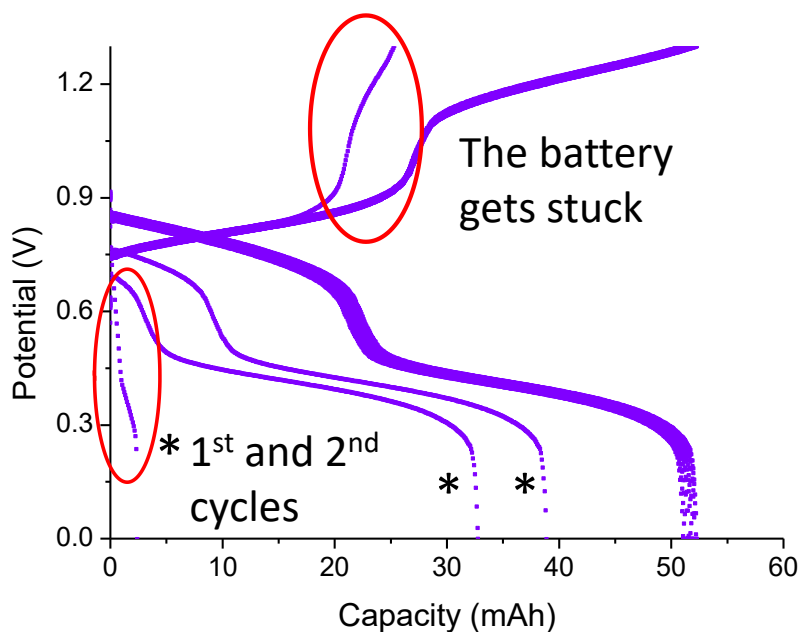

**Figure S14:** (a)  $E_{\text{cell}}$  vs Capacity plot at  $60 \text{ mA/cm}^2$  for the battery (which get stuck in the 15<sup>th</sup> cycle) using  $100 \text{ mM}$  of  $(\text{SPr})_3\text{4TpyTz}$  in  $1 \text{ M KCl}$  vs  $300 \text{ mM K}_4[\text{Fe}(\text{CN})_6]$  in  $1 \text{ M KCl}$  as electrolytes and  $\text{N212}^{\text{®}}$  membrane.

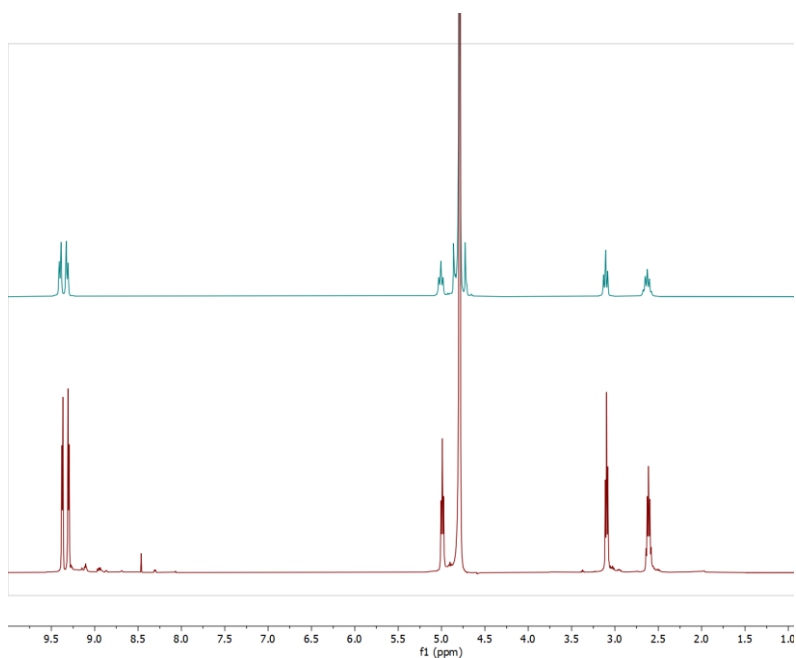

**Figure S15:**  $^1\text{H}$  NMR spectra of anolyte 100 mM  $(\text{SPr})_3\text{4TpyTz}$  in 1M KCl after the battery gets stuck, measured in  $\text{D}_2\text{O}$  before (blue trace) and after sticking (red trace). The peaks with small intensity in the red spectra could be ascribed to the reduced form of the  $(\text{SPr})_3\text{4TpyTz}$ .

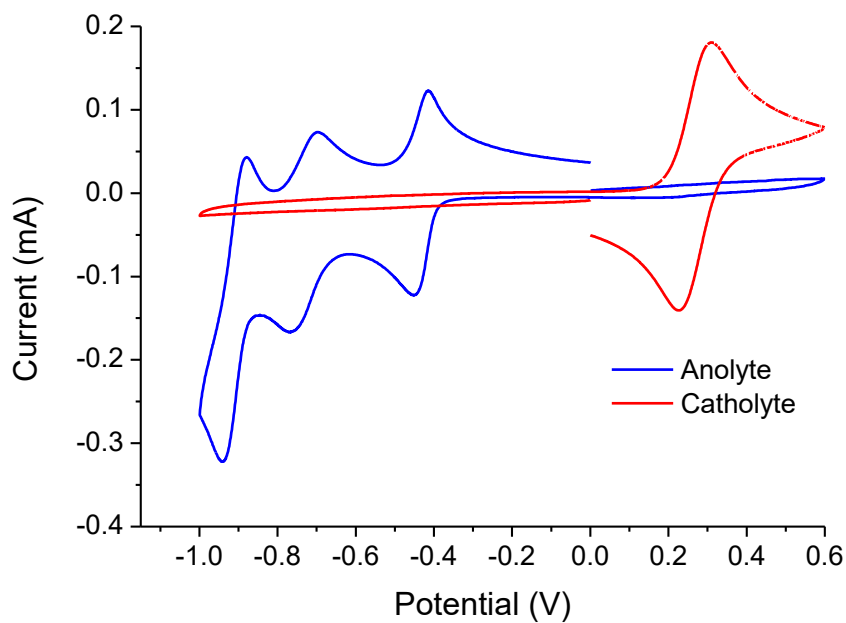

**Figure S16:** CV of anolyte 100 mM  $(\text{SPr})_3\text{4TpyTz}$  in 1M KCl and catholyte 100 mM  $\text{K}_4[\text{Fe}(\text{CN})_6]$  in 1 M of KCl after the battery gets stuck.

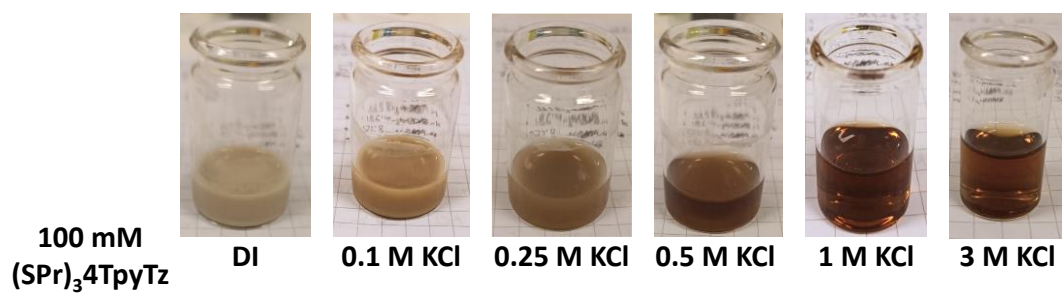

**Figure S17:** Pictures of the solution 100 mM of (SPr)<sub>3</sub>4TpyTz at with different concentrations of KCl.

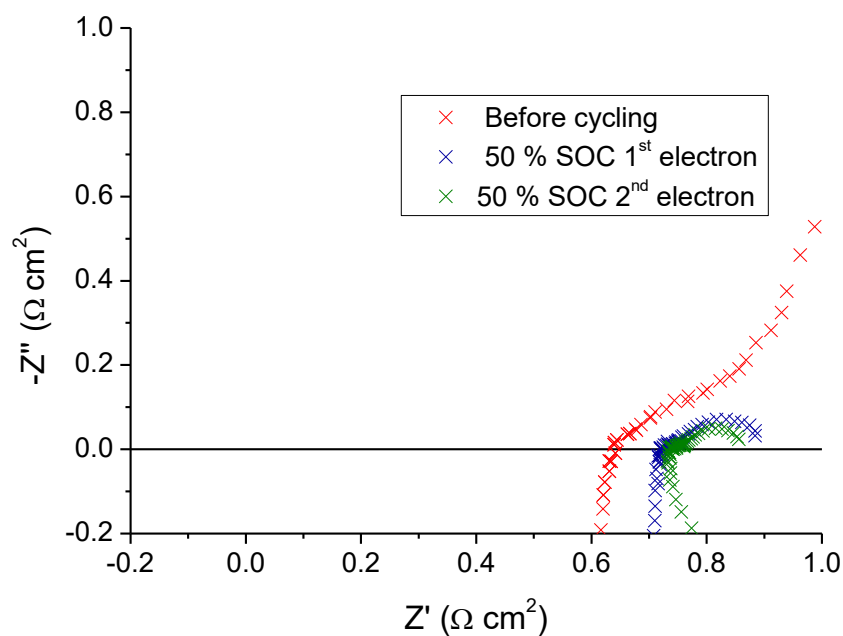

**Figure S18:** Electrochemical impedance spectroscopy for the battery 100 mM (SPr)<sub>3</sub>4TpyTz in 3M KCl vs 100 mM K<sub>4</sub>[Fe(CN)<sub>6</sub>] in 1 M of KCl before cycling (red crosses) 50 % SOC for the first process (blue crosses) and 50 % SOC for the second process (green crosses).

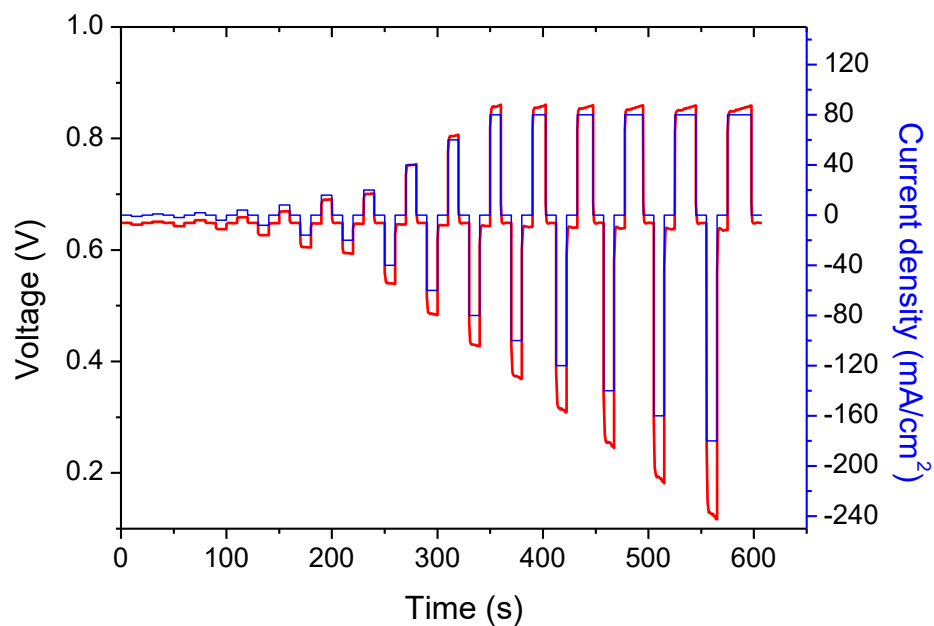

**Figure S19:** Current and voltage profile at consecutive charging, OCV and discharging at different currents for polarization curve of the first electron of the battery 100 mM (SPr)<sub>3</sub>4TpyTz in 3M KCl vs 100 mM K<sub>4</sub>[Fe(CN)<sub>6</sub>] in 1 M of KCl.

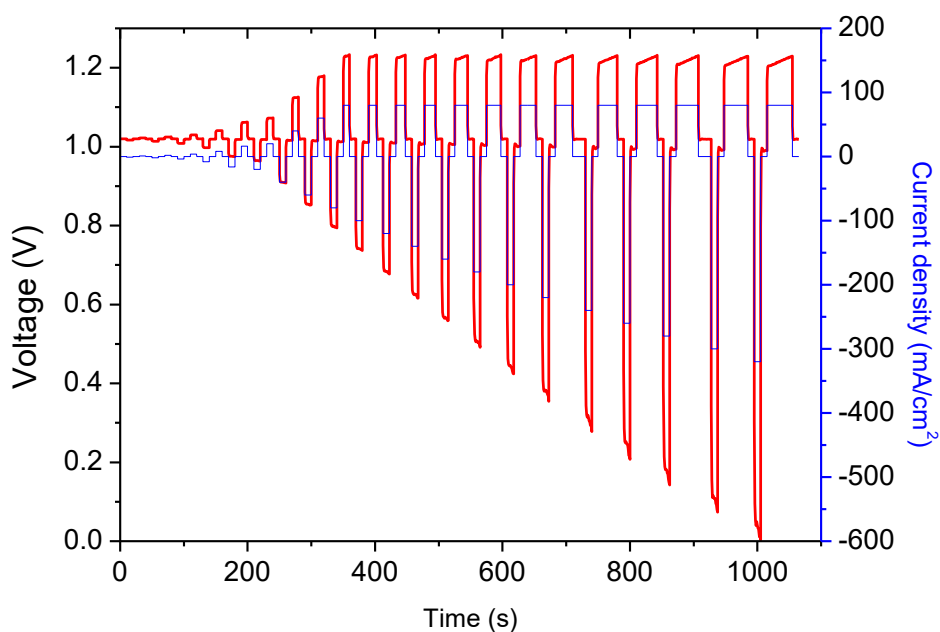

**Figure S20:** Current and voltage profile at consecutive charging, OCV and discharging at different currents for polarization curve of the second electron of the battery 100 mM (SPr)<sub>3</sub>4TpyTz in 3M KCl vs 100 mM K<sub>4</sub>[Fe(CN)<sub>6</sub>] in 1 M of KCl.

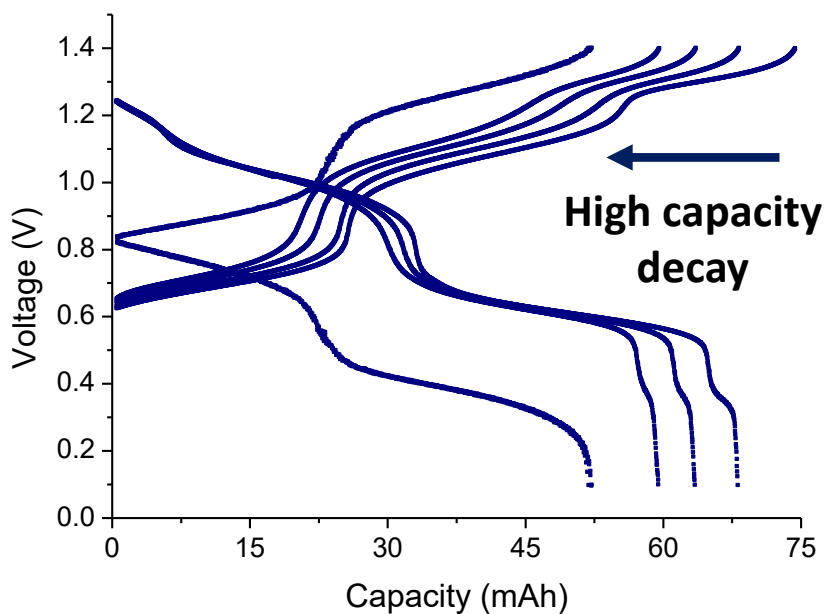

**Figure S21:**  $E_{\text{cell}}$  vs Capacity plot at  $60 \text{ mA/cm}^2$  for the battery  $100 \text{ mM (SPr)}_3\text{4TpyTz}$  in  $3\text{M KCl}$  vs  $100 \text{ mM K}_4[\text{Fe}(\text{CN})_6]$  in  $1 \text{ M}$  of  $\text{KCl}$  considering the third process.

**Table S1:** Comparison of the initial pH and the pH after reaching the third redox process for the battery  $100 \text{ mM (SPr)}_3\text{4TpyTz}$  in  $3\text{M KCl}$  vs  $100 \text{ mM K}_4[\text{Fe}(\text{CN})_6]$  in  $1 \text{ M}$  of  $\text{KCl}$ :

|                  | <i>pH</i><br><i>initial</i> | <i>pH</i> after $3^{\text{rd}}$<br><i>process</i> |
|------------------|-----------------------------|---------------------------------------------------|
| <i>Anolyte</i>   | 3.8                         | 12.22                                             |
| <i>Catholyte</i> | 8.0                         | 10.22                                             |

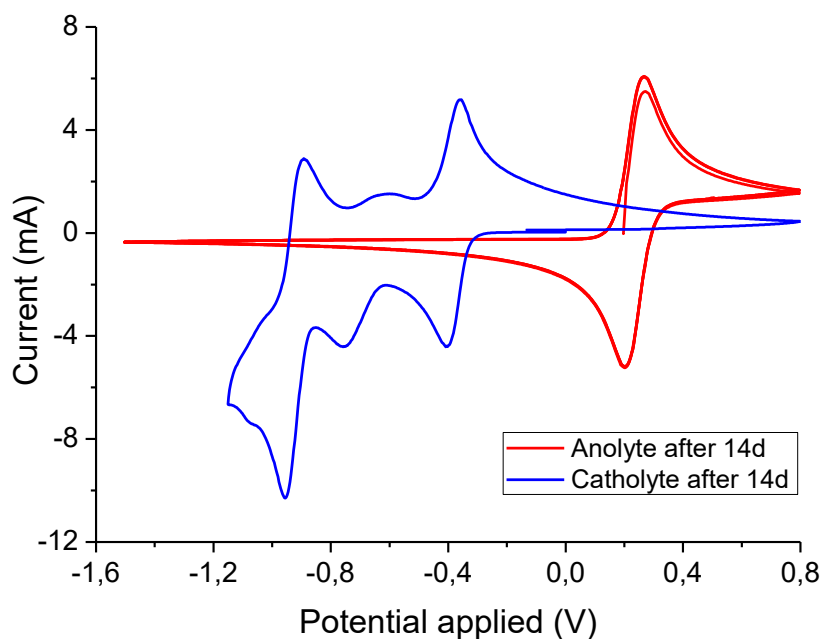

**Figure S22:** CV of anolyte 200 mM  $(\text{SPr})_3\text{4TpyTz}$  in 3M KCl and catholyte 300 mM  $\text{K}_4[\text{Fe}(\text{CN})_6]$  in 1 M of KCl after 14 days of battery cycling.

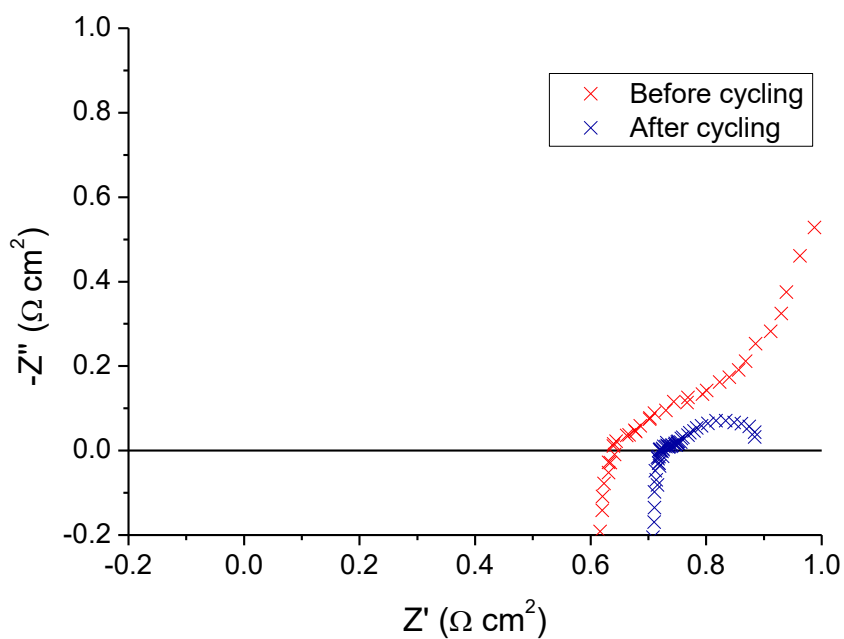

**Figure S23:** Electrochemical impedance spectroscopy for the battery 200 mM  $(\text{SPr})_3\text{4TpyTz}$  in 3M KCl vs 300 mM  $\text{K}_4[\text{Fe}(\text{CN})_6]$  in 1 M of KCl before and after 14 days of cycling the battery.

## 6. Comparison with other organic electrolytes

In the following table S2, a brief comparison between the **(SPr)<sub>3</sub>4TpyTz** with other viologen and triazine is depicted. Since **(SPr)<sub>3</sub>4TpyTz** represent a sulfonated triazine it seems logical to compare our results with other similar organic electrolytes. Some of the examples here showed used different strategies to enhance their performance such as the use of symmetrical electrolytes or the use of a potentiostatic holding at the end of the galvanostatic cycling. Analyzing the results of the sulfonated compound it seems clear that the use of symmetric electrolytes enhances the solubility. Otherwise, the compound R-Vi has been just studied using 0.1 M concentration.

| Anolyte                                                                                              | Catholyte                                                                                            | Cycles | Capacity retention (%) | EE (%) | current density (mA/cm <sup>2</sup> ) | Ref          |
|------------------------------------------------------------------------------------------------------|------------------------------------------------------------------------------------------------------|--------|------------------------|--------|---------------------------------------|--------------|
| (CBu) <sub>2</sub> V<br>0.85 M +<br>(NH <sub>4</sub> ) <sub>4</sub> [Fe(CN) <sub>6</sub> ]<br>0.85 M | (CBu) <sub>2</sub> V<br>0.85 M +<br>(NH <sub>4</sub> ) <sub>4</sub> [Fe(CN) <sub>6</sub> ]<br>0.85 M | 1000   | 100                    | 59.8   | 40                                    | 2            |
| (SPr) <sub>2</sub> V 0.9 M +<br>(NH <sub>4</sub> ) <sub>4</sub> [Fe(CN) <sub>6</sub> ]<br>0.9 M      | (SPr) <sub>2</sub> V 0.9 M +<br>(NH <sub>4</sub> ) <sub>4</sub> [Fe(CN) <sub>6</sub> ] 0.9<br>M      | 1000   | 100                    | 62.6   | 40                                    | 3            |
| 3,4-S <sub>2</sub> V 1.1 M +<br>(NH <sub>4</sub> ) <sub>4</sub> [Fe(CN) <sub>6</sub> ]<br>1.1 M      | 3,4-S <sub>2</sub> V 1.1 M +<br>(NH <sub>4</sub> ) <sub>4</sub> [Fe(CN) <sub>6</sub> ] 1.1<br>M      | 1700   | 100                    | 66.0   | 40                                    | 4            |
| BTMAP-Vi 0.75M                                                                                       | BTMAP-Fc 1,0 M                                                                                       | 500    | 99.45                  | n.s    | 50**                                  | 5            |
| BPP-Vi 1 M<br>14 M NH <sub>4</sub> OH                                                                | K <sub>3.5</sub> [Fe(CN) <sub>6</sub> ] 0.3 M<br>2M NH <sub>4</sub> Cl                               | 290    | 99.79                  | 66.3   | 100**                                 | 6            |
| R-Vi 0.1M<br>1 M KCl                                                                                 | K <sub>4</sub> [Fe(CN) <sub>6</sub> ] 0.1<br>1 M KCl                                                 | 3200   | 77.6                   | 87,0   | 50**                                  | 7            |
| Dex-Vi<br>(1.5 M)                                                                                    | BTMAP-Fc<br>0.75 M                                                                                   | 350    | 100                    | n.s    | 50**                                  | 8            |
| (TPyTz)Cl <sub>6</sub><br>0.3 M (x 3<br>electrons)                                                   | FcNCl<br>n. s.*                                                                                      | 50     | n.s                    | n.s    | 80                                    | 9            |
| <b>(SPr)<sub>3</sub>4TpyTz 0.1<br/>M (x 2 electrons)<br/>3 M KCl</b>                                 | K <sub>4</sub> [Fe(CN) <sub>6</sub> ] 0.1<br>1 M KCl                                                 | 180    | 100                    | 66.5   | 60                                    | This<br>work |
| <b>(SPr)<sub>3</sub>4TpyTz 0.2<br/>M (x 2 electrons)<br/>3 M KCl</b>                                 | K <sub>4</sub> [Fe(CN) <sub>6</sub> ] 0.3<br>1 M KCl                                                 | 500    | 93.8                   | 55.3   | 60                                    | This<br>work |

\* n. s.: not specified

\*\*Potentiostatic holding



## References

- [1] Kwabi, D. G.; Ji, Y.; Aziz, M. J. Electrolyte Lifetime in Aqueous Organic Redox Flow Batteries: A Critical Review. *Chem. Rev.* **2020**, *120*, 6467-6489.
- [2] Wu, W.; Wang, A.P.; Luo, J.; Liu, T. L. A Highly Stable, Capacity Dense Carboxylate Viologen Anolyte towards Long-Duration Energy Storage. *Angew. Chem. Int. Ed.* **2023**, *62*, e202216662.
- [3] Luo, J.; Hu, B.; Debruler, C.; Bi, Y.; Zhao, Y.; Yuan, B.; Hu, M.; Wu, W.; Liu, T. L. Unprecedented Capacity and Stability of Ammonium Ferrocyanide Catholyte in pH Neutral Aqueous Redox Flow Batteries. *Joule.* **2019**, *3*, 149-163.
- [4] Hu, M.; Wu, W.; Luo, J.; Liu, T. L. Desymmetrization of Viologen Anolytes Empowering Energy Dense, Ultra Stable Flow Batteries toward Long-Duration Energy Storage. *Adv. Energy Mater.* **2022**, *12*, 2202085-2202093.
- [5] Beh, E. S.; De Porcellinis, D.; Gracia, R. L.; Xia, K. T.; Gordon, R. G.; Aziz, M. J. A Neutral pH Aqueous Organic–Organometallic Redox Flow Battery with Extremely High Capacity Retention. *ACS Energy Lett.* **2017**, *2*, 639-644.
- [6] Jin, S.; Fell, E. M.; Vina-Lopez, L.; Jing, Y.; Michalak, P. W.; Gordo, R. G.; Aziz, M. J. Near Neutral pH Redox Flow Battery with Low Permeability and Long-Lifetime Phosphonated Viologen Active Species. *Adv. Energy Mater.* **2020**, *10*, 2000100-2000110.
- [7] Li, H.; Fan, H.; Hu, B.; Hu, L.; Chang, G.; Song, J. Spatial Structure Regulation: A Rod-Shaped Viologen Enables Long Lifetime in Aqueous Redox Flow Batteries. *Angew. Chem. Int. Ed.* **2021**, *60*, 26971-26977.
- [8] Lv, X.-L.; Sullivan, P.; Fu, H.-C.; Hu, X.; Liu, H.; Jin, S.; Li, W.; Feng, D. Dextrosil-Viologen: A Robust and Sustainable Anolyte for Aqueous Organic Redox Flow Batteries. *ACS Energy Lett.* **2022**, *7*, 2428-2434.
- [9] Huang, J.; Hu, S.; Yuan, X.; Xiang, Z.; Huang, M.; Wan, K.; Piao, J.; Fu, Z.; Liang, Z. Radical Stabilization of a Tripyridinium–Triazine Molecule Enables Reversible Storage of Multiple Electrons. *Angew. Chem. Int. Ed.* **2021**, *60*, 20921-20925.
